# Supplementary material for: Risk Factors for Lymph Node Metastasis and Oncologic Outcomes in Small Rectal Neuroendocrine Tumors with Lymphovascular Invasion
Source: PubMed Central journal article supplement — Gut Liver. 2021 Sep 24;16(2):228–35. doi: 10.5009/gnl20364 (PMC8924811; doi:10.5009/gnl20364), 2021-09-24
Supplement: gnl-16-2-228-supple.pdf [file gnl-16-2-228-supple.pdf]

**Supplementary Table 1.** Clinical Characteristics of Recurrence and Mortality Cases

| Sex/age* | Tumor size, mm | Tumor location | Treatment | Invasion depth | Ki-67 index, %  | Harvested LNs | Metastatic LNs | TNM stage | Status        | Follow-up period, mo | Cause of death |
|----------|----------------|----------------|-----------|----------------|-----------------|---------------|----------------|-----------|---------------|----------------------|----------------|
| F/75     | 6              | AV 6 cm        | EMR       | SM             | NA <sup>†</sup> | NA            | NA             | T1N0M0    | Death         | 29                   | Stomach cancer |
| M/53     | 9              | AV 4 cm        | LAR       | SM             | <3              | 20            | 0              | T1N0M0    | Death         | 69                   | Acute leukemia |
| M/71     | 12             | AV 3 cm        | LAR       | SM             | >20             | 10            | 2              | T1N1M0    | Recur & death | 41                   | Lung cancer    |

LN, lymph node; F, female; M, male; AV, anal verge; EMR, endoscopic mucosal resection; LAR, low anterior resection; SM, submucosa; NA, not applicable.

\*Patients' sex and age at diagnosis; <sup>†</sup>Ki-67 data was not available, but mitosis was absent for this patient.
